# Supplementary material for: Twelve-Month Longitudinal Serology in SARS-CoV-2 Naïve and Experienced Vaccine Recipients and Unvaccinated COVID-19-Infected Individuals
Source: MDPI journal article supplement (doi:10.3390/vaccines10050813), 2022-05-20
Supplement: s1 [file s1]

## Supplemental Tables

**Table S1.** Time intervals for serum collection after COVID-19 onset or vaccination.

| Time passed since<br>infection or<br>vaccination | Infection-Only<br>(n=343) |                      | Vaccination-Only<br>(n=375) |                      | Infection + Vaccination<br>(n=226) |                      |
|--------------------------------------------------|---------------------------|----------------------|-----------------------------|----------------------|------------------------------------|----------------------|
|                                                  | n                         | Median days<br>(IQR) | n                           | Median days<br>(IQR) | n                                  | Median days<br>(IQR) |
| 1 month<br>(<60 days)                            | 82                        | 22 (16-46)           | 139                         | 36 (34-42)           | 78                                 | 36 (34-40)           |
| 3 months<br>(60 – 149 days)                      | 141                       | 87 (74-95)           | 122                         | 94 (91-101)          | 86                                 | 95 (90-117)          |
| 6 months<br>(150 – 239 days)                     | 75                        | 174 (165-194)        | 79                          | 184 (182-192)        | 50                                 | 189 (181-206)        |
| 9 months<br>(240 – 329 days)                     | 35                        | 281 (265-307)        | 35                          | 273 (266-274)        | 12                                 | 267 (260-275)        |
| 12 months<br>(≥330 days)                         | 10                        | 390 (363-413)        | -                           | -                    | -                                  | -                    |

**Table S2.** Time between positive COVID-19 test and first vaccine dose for individuals in the infection + vaccination group.

| <b>Time between positive<br/>COVID-19 test and first<br/>vaccine dose</b> | <b>n (%)</b> |
|---------------------------------------------------------------------------|--------------|
| 0-3 months                                                                | 19 (15.6)    |
| 3-6 months                                                                | 23 (18.9)    |
| 6-9 months                                                                | 28 (23.0)    |
| 9-12 months                                                               | 17 (13.9)    |
| 12+ months                                                                | 6 (4.9)      |
| Unknown                                                                   | 29 (23.8)    |

**Table S3.** Characteristics predicting higher levels of serum SARS-CoV-2-specific antibodies.

|                                     | <b>Spike-specific IgG</b> |               | <b>RBD-specific IgA</b> |               |
|-------------------------------------|---------------------------|---------------|-------------------------|---------------|
| <b>Characteristic</b>               | <b>Odds ratio</b>         | <b>95% CI</b> | <b>Odds ratio</b>       | <b>95% CI</b> |
| <b>Age (years)</b>                  |                           |               |                         |               |
| 12-17                               | 1 (Ref)                   | -             | 1 (Ref)                 | -             |
| 18-29                               | 0.56                      | 0.39 - 0.81   | 0.86                    | 0.68-1.09     |
| 30-54                               | 0.68                      | 0.48 - 0.95   | 0.92                    | 0.74-1.15     |
| ≥55                                 | 0.71                      | 0.42 - 1.19   | 1.02                    | 0.73-1.44     |
| <b>Sex</b>                          |                           |               |                         |               |
| Male                                | 1 (Ref)                   | -             | 1 (Ref)                 | -             |
| Female                              | 0.86                      | 0.66 - 1.14   | 0.68                    | 0.57-0.81     |
| <b>Infection/vaccination status</b> |                           |               |                         |               |
| Infection-Only                      | 1 (Ref)                   | -             | 1 (Ref)                 | -             |
| Vaccination-Only                    | 6.38                      | 4.74 - 8.60   | 1.03                    | 0.85-1.25     |
| Infection + Vaccination             | 15.19                     | 10.90 - 21.16 | 2.55                    | 2.07-3.13     |

## Supplemental Figures

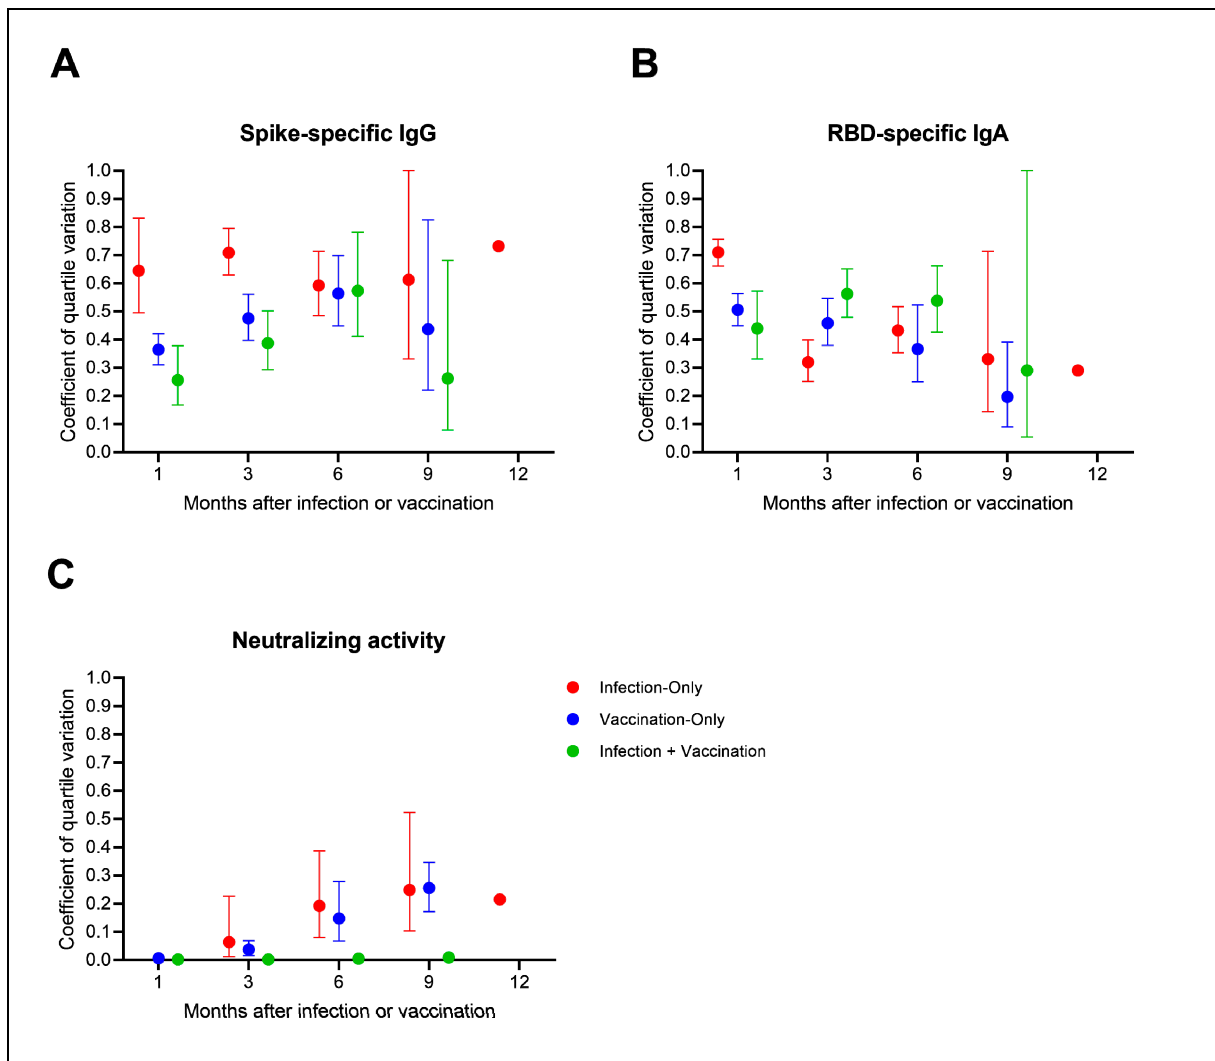

**Figure S1. Change in the variation of SARS-CoV-2-specific antibody responses over time following infection or vaccination or both.** Coefficients of quartile variation (CQVs) for **(A)** spike-specific IgG, **(B)** RBD-specific IgA, and **(C)** serum neutralizing activity at each time point past vaccination or infection are presented for participants in the infection-only, vaccination-only, and infection + vaccination groups. Dots are the CQV, calculated using the interquartile range for each group at each time point. Error bars represent 95% confidence intervals determined by Bonnett's method. Color corresponds with group.

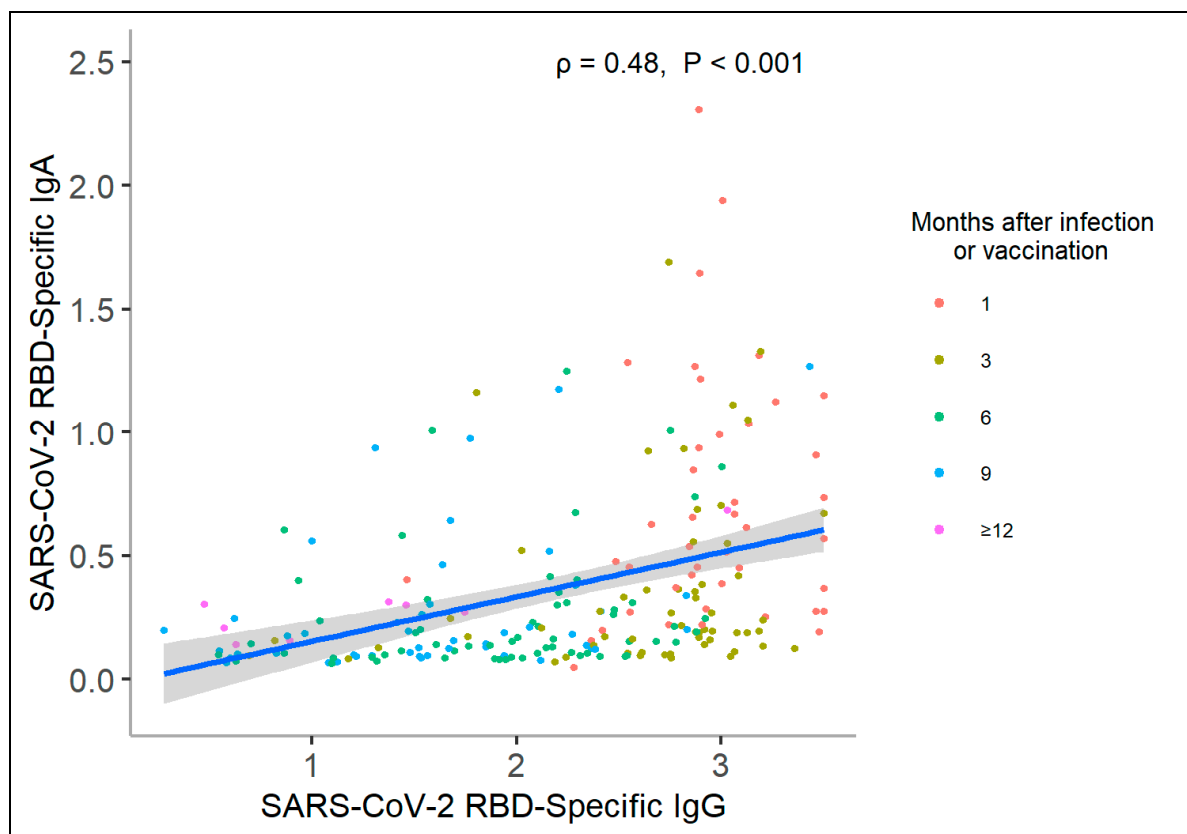

**Figure S2. Correlation between serum SARS-CoV-2 IgG and IgA levels.** Correlation between SARS-CoV-2-specific IgG and IgA in the same serum sample was determined using Spearman's correlation coefficient. Color corresponds to month past infection or vaccination.
